# Supplementary material
Source: ML conference proceedings conference paper supplement (https://proceedings.mlr.press/v108/gluch20a.html)
Supplement: Supplementary file 1 [file gluch20a-supp.pdf]

## A Hard distribution for randomized smoothing described in (3)

Consider the following data distribution. For  $\epsilon$  that will be fixed later, let  $S_\epsilon(0) \subseteq \mathbb{R}^d$  be a sphere of radius  $\epsilon$  around 0 and  $N \subseteq S_\epsilon(0)$  be a set of cardinality  $e^{0.118d}$  such that for all  $x, y \in N, x \neq y$  we have  $\|x - y\|_2 \geq 1.2\epsilon$ . One can show that such a set exists using bounds for the surface area of spherical caps in high dimension (see Blum et al. (2015)).

Let the binary classification task be as follows. Let the distribution  $\mathcal{D}_{+1}$  for class +1 be such that  $\text{supp}(\mathcal{D}_{+1}) = (N \cup \{0\}) + B_{0.01\epsilon}$  (where the + denotes the Minkowski sum). The density function on  $B_{0.01\epsilon}(0)$  is  $e^{0.108d}$  times larger than the one on  $B_{0.01\epsilon}(u)$  for every  $u \in N$ . Now let  $\mathcal{D}_{-1}$  be such that  $\text{supp}(\mathcal{D}_{-1}) \cap \text{supp}(\mathcal{D}_{+1}) = \emptyset$  and each class has probability 1/2. Now assume that the points that classifier  $f$  misclassifies are exactly points in  $B_{0.01\epsilon}(0)$ . Then the standard error of  $f$  is at most  $e^{-0.01d}$ . Now let  $\epsilon := \sqrt{(d\sigma)/10}$ . One can verify that when  $g$  is computed according to (1) then for all  $x \in N + B_{0.01\epsilon}$  we have  $g(x) = -1$ , which means that  $g$  misclassifies all points from  $N + B_{0.01\epsilon}$ . So the standard error of  $g$  is at least 25%. This means that the error of  $g$  is  $e^{\Theta(d)}$  times larger than the error of  $f$ !

**Remark 2.** *One might argue that this example was crafted artificially and that in the “real world” we can choose  $\sigma$  depending on the data. However it is possible to construct examples such that for any reasonable choice of  $\sigma$  a dynamic similar to the one presented above occurs. The idea is to put a collection of the above configurations at different scales and far from each other.*

## B Generalization of definitions to nonseparable learning tasks

**Definition 2a.** For a binary classification task and a classifier  $f : \mathbb{R}^d \rightarrow \{-1, 1\}$  we define **Risk** as

$$R(f) := \int p_X(x) \sum_{y \in \{-1, 1\}} \mathbb{P}_{Y|X}(y|x) \mathbb{1}_{\{f(x) \neq y\}} dx.$$

**Definition 3a.** For a binary classification task, a classifier  $f : \mathbb{R}^d \rightarrow \{-1, 1\}$ , and  $\epsilon \geq 0$  we define **Adversarial Risk** as

$$AR(f, \epsilon) := \int p_X(x) g(f, x, \epsilon) dx,$$

where

$$g(f, x, \epsilon) := \begin{cases} \mathbb{P}_{Y|X}(-1 | x), & B_\epsilon(x) \subseteq M_1(f), \\ \mathbb{P}_{Y|X}(1 | x), & B_\epsilon(x) \subseteq M_{-1}(f), \\ 1, & \text{otherwise,} \end{cases}$$

where  $M_y = f^{-1}(\{y\})$ ,  $y \in \{-1, 1\}$ . We also introduce the notation:

$$AR(\epsilon) := \inf_f AR(f, \epsilon),$$

to denote the optimal classification error for that classification task with a given  $\epsilon$ .

Note that this definition assumes that the adversary, apart from  $x$ , has also access to the label  $y$ . In other words, we prove bounds with respect to a strong adversary.

**Definition 4a (Separation function).** For a binary classification task we define the separation function  $S(\epsilon)$  as follows:

$$S(\epsilon) := \inf_{\substack{E_{-1}, E_1 \subseteq \mathbb{R}^d \\ d(\mathbb{R}^d \setminus E_{-1}, \mathbb{R}^d \setminus E_1) \geq \epsilon}} \sum_{y \in \{-1, 1\}} \int_{x \in E_y} p_X(x) \mathbb{P}_{Y|X}(y | x) dx.$$

For a given  $\epsilon > 0$  this function returns the minimum probability mass that needs to be removed so that the classes are separated by an  $\epsilon$ -margin.

**Lemma 7.** *For all binary classification tasks and all  $\epsilon \geq 0$  we have that:*

$$AR(\epsilon) = S(2\epsilon).$$

*Proof.* First we prove that  $AR(\epsilon) \leq S(2\epsilon)$ . Let  $E_{-1}$  and  $E_1$  be the minimizer sets from the definition of  $S(2\epsilon)$ . Let  $f(x) := -1$  if  $d(x, \mathbb{R}^d \setminus E_{-1}) \leq \epsilon$  and  $f(x) := 1$  otherwise. Then observe that for all  $x \in (\mathbb{R}^d \setminus E_{-1})$ ,  $B_\epsilon(x) \subseteq M_{-1}(f)$  and for all  $x \in (\mathbb{R}^d \setminus E_1)$ ,  $B_\epsilon(x) \subseteq M_1(f)$ . Hence  $AR(\epsilon) \leq S(2\epsilon)$ .

Now we prove that  $AR(\epsilon) \geq S(2\epsilon)$ . Let  $f$  be a classifier with  $AR(f, \epsilon) = r$ . Let  $E_{-1}$  be the set of all points  $x \in \mathbb{R}^d$  so that  $B_\epsilon(x) \not\subseteq M_{-1}(f)$  and let  $E_1$  be the set of all points  $x \in \mathbb{R}^d$  so that  $B_\epsilon(x) \not\subseteq M_1(f)$ . It follows that

$$d(\mathbb{R}^d \setminus E_{-1}, \mathbb{R}^d \setminus E_1) \geq 2\epsilon. \quad (13)$$

But now note that for this choice of sets  $E_{-1}$  and  $E_1$ ,

$$\sum_{y \in \{-1, 1\}} \int_{x \in E_y} p_X(x) \mathbb{P}_{Y|X}(y | x) dx = r = AR(f, \epsilon).$$

Hence, for  $S(2\epsilon)$ , being defined as the infimum over all choices of sets  $E_{-1}$  and  $E_1$  which fulfill (13), we have  $S(2\epsilon) \leq r = AR(f, \epsilon)$ .  $\square$

## C Running time discussion

Let us now analyze the running times of Algorithm 1 as a function of the used partition as well as the method of estimating  $g$ . In the stated bounds we will assume that each evaluation of  $f$  takes time  $t$ .

### C.0.1 Cube partition

**Scheme B:** First let's analyze the performance of Cube partitions together with assumption (9). To evaluate  $\hat{g}(x)$  we need to locate a cube to which  $x$  belongs to and smooth  $f$  over that cube. Smoothing is approximated by a sample mean and as argued before  $O(\log(Q))$  samples suffice. So in the end the running time per query is  $O(t \cdot \log(Q))$ . If we store (using hashing techniques) previous function evaluations then the query time drops to  $O(1)$  for queries from cubes that were already queried before.

**Scheme A:** If we use (4) instead of (9) then we first perform a preprocessing step in which we sample a set  $U$  of unlabeled samples of size (6). Then using standard hashing techniques we can create a data structure of size (6) that for a point  $x \in \mathbb{R}^d$  will provide access to  $U \cap \pi(x)$  in  $O(1)$  time per accessed element. Having that query time is  $O(t \cdot \log(Q))$  because, as argued before, for each cube it's enough to consider only that many samples to compute a good estimator. Similarly as in the previous case for repeated queries time drops to  $O(1)$ .

### C.0.2 Ball carving partition

**Scheme B:** Now let's analyze Ball carving partitions with assumption (9). The situation here is much more complicated and the implementation is much more involved. To compute  $g$  we need access to an  $\epsilon/4$ -net  $N$  that covers  $\text{supp}(\mathcal{D})$ . We create  $N$  on the fly. I.e., we start with  $N = \emptyset$  and when a query  $q \in \text{supp}(\mathcal{D})$  arrives then if  $q \notin \bigcup_{u \in N} B_{\epsilon/4}(u)$  we add  $q$  to  $N$ . Whenever we add a vertex to  $N$  we sample a new permutation  $\sigma$  on  $N$ , which corresponds to a new partition. This means that when a point is added to  $N$  then  $g$  can change. But once the construction process stabilizes then  $g$  remains fixed. Using Chebyshev's inequality one can verify that if for  $O(1/R(f))$  consecutive queries we don't add new vertices to  $N$  then  $\bigcup_{u \in N} B_{\epsilon/4}(u)$  contains  $1 - O(R(f))$  probability mass of  $\mathcal{D}$  with probability  $1 - R(f)$ . When this event occurs we can stop changing  $N$  as the probability mass not covered by  $N$  is  $O(R(f))$  with high probability. Finally observe

that:

$$\begin{aligned} |N| &\leq \max_{\substack{N' \subseteq \text{supp}(\mathcal{D}): \\ N' \text{ is } \epsilon/4\text{-net}}} |N'| \\ &\leq \min_{\substack{N' \subseteq \text{supp}(\mathcal{D}): \\ N' \text{ eq is } \epsilon/8\text{-net}}} |N'| =: Q_{\max}. \end{aligned}$$

Now let's analyze the running time. Consider a query  $q \in \mathbb{R}^d$ . To compute  $g(q)$  we must first check if  $q$  should be added to  $N$  and this can be done in  $O(|N|)$  time. Then we choose a random permutation and locate the set  $\pi(q)$  to which  $q$  belongs (also in  $O(|N|)$  time).

After locating  $u \in N$  such that  $q \in B_R(u) \setminus \bigcup_{w: \sigma(w) < \sigma(u)} B_R(w) = \pi(q)$  we need to sample points uniformly at random from  $\pi(q)$  to compute sample mean to estimate  $g(q)$ . One way to do that is to use Hit-and-Run sampling. To generate a uniformly random point from  $\pi(q)$  we generate a sequence  $\{x_i\} \subseteq \pi(q)$  according to the following rule:

- $x_0 = q$ ,
- to generate  $x_{i+1}$  from  $x_i$  we first pick a random direction  $v$ . We find minimal and maximal values such that  $x_i + \theta \cdot v \in \pi(q)$ . We pick  $\theta^*$  uniformly from the interval  $[\theta_{\min}, \theta_{\max}]$  and we set  $x_{i+1} := x_i + \theta^* \cdot v$ .

After generating some number of points we declare the last point as a point drawn from  $U(\pi(q))$ . The time needed to generate one sample is  $k \cdot O(|N|)$ , where  $k$  is the number of iterations we perform.

To get an algorithm with a theoretical guarantee on the running time for sampling points one can resort to an algorithm from Dyer et al. (1991). That algorithm implicitly, in polynomial in  $d$  time, samples a point uniformly at random from a convex body. It is possible to adapt the algorithm to the case of non-convex bodies (as our set  $\pi(q)$  is not necessarily convex). We can think that  $\pi(q)$  is "close" to being convex as it is defined by a carving process with balls of equal radii. Recall from previous discussion that it's enough to have  $O(\log(Q))$  samples per set. So in the end if we use this algorithm then the running time for computing  $g(p)$  will be  $O(\text{poly}(d) \cdot \log(Q) \cdot |N| + t \log(Q)) = O(\text{poly}(d) \cdot Q_{\max} \log(Q_{\max}) + t \log(Q_{\max}))$ .

**Scheme A:** If we use (4) instead of (9) then we first perform a preprocessing step in which we sample a set  $U$  of unlabeled samples of size (6) (with  $Q$  set to  $Q_{\max}$ ). Then we use a greedy algorithm

to find a maximal subset  $N \subseteq U$  such that for every  $u, w \in N, u \neq w$  we have  $\|u - w\|_2 \geq \epsilon/4$ . Using Chebyshev's inequality one can argue that with high probability  $\bigcup_{u \in N} B_{\epsilon/4}(u)$  contains  $1 - O(R(f))$  mass of  $\mathcal{D}$ . We then perform the ball carving partition using  $N$ . Then in time  $\tilde{O}(Q_{\max}^2)$  we create a data structure of size (6) that for a point  $u \in N$  will provide access to  $U \cap (B_R(u) \setminus \bigcup_{w: \sigma(w) < \sigma(u)} B_R(w))$  in  $O(1)$  time per accessed element. Then for a query  $q$  we need to first locate  $u \in N$  such that  $q \in \pi(u)$ , which takes  $O(Q_{\max})$  time and then we compute sample mean in  $O(t \cdot \log(Q_{\max}))$  time. So in the end the running time per query is  $O(t \cdot \log(Q_{\max}))$ . If there is a repeated query for the same set then we can answer it in  $O(Q_{\max})$  time.

The  $O(Q_{\max})$  factor in both approaches is far from perfect. However there might be hope to decreasing this factor to  $2^{O(dd(\text{supp}(M), \epsilon))}$  using locality sensitive hashing techniques (Gionis et al. (1999)) as in principle we only need to check points in the neighborhood of  $q$  to determine  $\pi(q)$  and in this neighborhood we have only  $2^{O(dd(\text{supp}(M), \epsilon))}$  of them. It might also be possible to reduce the running time further which might be an interesting research direction.

**Remark 3.** Assume that the data is supported on a lower dimensional manifold of dimension  $d'$  and satisfies the assumptions from Theorem 3. Then robustness guarantees of our algorithms improve automatically with  $d'$ . That is we don't need to provide  $d'$  as the input to our algorithms.

## D Omitted proofs

### D.1 Proofs of Section 3

**Lemma 1.** For all separable binary classification tasks and all  $\epsilon \in \mathbb{R}_{\geq 0}$  we have that:

$$AR(\epsilon) = S(2\epsilon).$$

*Proof.* First we prove that  $AR(\epsilon) \leq S(2\epsilon)$ . Let  $E$  be the minimizer set from the definition of  $S(2\epsilon)$ . Let  $f(x) := -1$  if  $d(x, M_- \setminus E) \leq \epsilon$  and  $f(x) := +1$  otherwise. Then observe that for all  $x \in (M_- \setminus E) \cup (M_+ \setminus E)$  there does not exist an  $\eta$  so that  $f(x + \eta) \neq h(x)$ . Hence  $AR(\epsilon) \leq S(2\epsilon)$ .

Now we prove that  $AR(\epsilon) \geq S(2\epsilon)$ . Let  $f$  be a classifier with  $AR(f, \epsilon) = r$ . That means that there exists  $A \subseteq \mathbb{R}^d$  such that

- $\mathbb{P}_X(X \in A) \geq 1 - r$ ,
- for all  $x \in A$  we have  $\forall \eta \in B_\epsilon f(x + \eta) = h(x)$ .

This means that  $\mathbb{R}^d \setminus A$  is a  $2\epsilon$ -separator for that binary task, so in turn  $S(2\epsilon) \leq r = AR(f, \epsilon)$ .  $\square$

### D.2 Proofs of Section 4

**Fact 2.**  $dd((\mathbb{R}^d, \ell_2)) \leq 3d$

*Proof.* Let  $B_\epsilon(0) \subseteq \mathbb{R}^d$  be a ball of radius  $\epsilon$  for some  $\epsilon > 0$ . Let  $N$  be an  $\epsilon/2$ -net of  $B_\epsilon(0)$ . Notice that all balls in  $\{B_{\epsilon/4}(u) : u \in N\}$  are pairwise disjoint and that  $\bigcup_{u \in N} B_{\epsilon/4}(u) \subseteq B_{5\epsilon/4}(0)$ . Hence  $|N| \leq \frac{\text{vol}(B_{5\epsilon/4})}{\text{vol}(B_{\epsilon/4})} = 5^d$ .  $\square$

**Lemma 2.** Let  $(M, d)$  be a metric space with  $\epsilon$ -doubling dimension  $dd$ . If all pairwise distances in  $N \subseteq M$  are at least  $r$  then for any point  $x \in M$  and radius  $r \leq t \leq \epsilon$  we have  $|B_t(x) \cap N| \leq 2^{dd \lceil \log \frac{2t}{r} \rceil}$ .

*Proof.* As  $t \leq \epsilon$  we can use the definition of  $\epsilon$ -doubling dimension and get that  $B_t(x)$  can be covered with  $2^{dd}$  balls of radius  $t/2$ . Iterating that argument, we conclude that  $B_t(x)$  can be covered by  $2^{dd \lceil \log \frac{2t}{r} \rceil}$  balls of radius  $r/2$ . But every such ball can contain at most one point from  $N$  so  $|B_t(x) \cap N|$  is also upper bounded by  $2^{dd \lceil \log \frac{2t}{r} \rceil}$ .  $\square$

### D.3 Proofs of Section 5

**Corollary 1.** Let  $\Pi \sim \mathcal{P}$  be an  $(\epsilon, \beta, \delta)$ -padded random partition of a metric space  $(M, d)$ . Then for every distribution  $\mathcal{D}$  we have that:

$$\mathbb{E}_{\Pi \sim \mathcal{P}}[\mathbb{P}_{X \sim \mathcal{D}}[B_{\epsilon/\beta}(X) \not\subseteq \Pi(X)]] \leq \delta.$$

*Proof.*

$$\begin{aligned} & \mathbb{E}_{\Pi \sim \mathcal{P}}[\mathbb{P}_{X \sim \mathcal{D}}[B_{\epsilon/\beta}(X) \not\subseteq \Pi(X)]] \\ &= \mathbb{E}_{\Pi \sim \mathcal{P}}[\mathbb{E}_{X \sim \mathcal{D}}[\mathbb{1}_{\{B_{\epsilon/\beta}(X) \not\subseteq \Pi(X)\}}]] \\ &= \mathbb{E}_{X \sim \mathcal{D}}[\mathbb{E}_{\Pi \sim \mathcal{P}}[\mathbb{1}_{\{B_{\epsilon/\beta}(X) \not\subseteq \Pi(X)\}}]] \\ &= \mathbb{E}_{X \sim \mathcal{D}}[\mathbb{P}_{\Pi \sim \mathcal{P}}[B_{\epsilon/\beta}(X) \not\subseteq \Pi(X)]] \leq \delta. \end{aligned}$$

$\square$

**Lemma 3.** Let  $\Pi$  be a Cube partition with parameter  $\epsilon$ . Then for every  $\beta > 2\sqrt{d}$  it is  $(\epsilon, \beta, \frac{O(d^{1.5})}{\beta})$ -padded.

*Proof.* For all  $x \in \mathbb{R}^d$ ,  $\text{diam}(\Pi(x)) = \epsilon$  by construction. Let  $A = \left[0, \frac{\epsilon}{\sqrt{d}}\right]^d$ . This is the set of all points of one fundamental cube. Let  $G = \left[\frac{\epsilon}{\beta}, \frac{\epsilon}{\sqrt{d}} - \frac{\epsilon}{\beta}\right]^d$  and note that  $d(G, \mathbb{R}^d \setminus A) = \frac{\epsilon}{\beta}$ .  $G$  represents the set of all good points inside  $A$ , in the sense that if we

center a sphere of radius  $\epsilon/\beta$  at one of those points the whole sphere stays contained inside  $A$ . Now observe that

$$\frac{\text{vol}(G)}{\text{vol}(A)} = \left(1 - \frac{2\sqrt{d}}{\beta}\right)^d \geq 1 - \frac{2 \cdot d^{1.5}}{\beta}. \quad (14)$$

Let  $v$  be the shift that generates the partition  $\pi$ . Consider the set  $I(v) := \bigcup_{z \in v + \frac{\epsilon}{\sqrt{d}}\mathbb{Z}^d} (G + z)$ . Using (14), we conclude by noting that for every  $x \in \mathbb{R}^d$

$$\mathbb{P}_{\Pi \sim \mathcal{P}}[B_{\frac{\epsilon}{\beta}}(x) \not\subseteq \Pi(x)] \leq \mathbb{P}_{V \sim U(A)}[x \notin I(V)] \leq \frac{2d^{\frac{3}{2}}}{\beta}.$$

□

#### D.4 Proofs of Section 6

**Lemma 5.** *Let  $\pi$  be an  $\epsilon$ -bounded partition. For a given  $f$  let  $g(x) = \text{sgn}(\mathbb{E}_{Z \sim \mathcal{D}}[f(Z)|Z \in \pi(x)])$ . Then*

$$R(g) \leq 2S(\epsilon) + 2R(f).$$

*Proof.* Let us first prove the weaker bound  $R(g) \leq 3S(\epsilon) + 2R(f)$ . Let  $E$  be the minimizer set from the definition of  $S(\epsilon)$  and  $M_- = h^{-1}(\{-1\})$ ,  $M_+ = h^{-1}(\{1\})$ . Then we know that  $d(M_- \setminus E, M_+ \setminus E) \geq \epsilon$  and  $\mathbb{P}_{X \sim \mathcal{D}}(X \in E) \leq S(\epsilon)$ . Let  $Q \subseteq M_- \cup M_+$  be the set of missclassified points of  $f$  in  $M_- \cup M_+$ . Observe that

$$\begin{aligned} R(g) &\leq S(\epsilon) + \sum_{u \in N, \hat{\Pi}(u) \cap M_- \neq \emptyset, g(\hat{\Pi}(u)) = +1} \mu(\hat{\Pi}(u)) \\ &\quad + \sum_{u \in N, \hat{\Pi}(u) \cap M_+ \neq \emptyset, g(\hat{\Pi}(u)) = -1} \mu(\hat{\Pi}(u)) \\ &\leq S(\epsilon) + \sum_{\substack{u \in N, \hat{\Pi}(u) \cap M_- \neq \emptyset, \\ g(\hat{\Pi}(u)) = +1}} 2\mu(\hat{\Pi}(u) \cap (Q \cup E)) \\ &\quad + \sum_{\substack{u \in N, \hat{\Pi}(u) \cap M_+ \neq \emptyset, \\ g(\hat{\Pi}(u)) = -1}} 2\mu(\hat{\Pi}(u) \cap (Q \cup E)) \\ &\leq S(\epsilon) + 2(\mu(Q) + \mu(E)) \\ &\leq 3S(\epsilon) + 2R(f). \end{aligned}$$

To see that the claimed stronger bound is valid note the following. Every point in  $E$  will appear either in exactly one of the two sums or it will be counted by the term  $S(E)$ . In the first two cases it is weighted by a factor 2 and in the second case it is weighted by a factor 1. This gives rise to the term  $3S(E)$ . But no point of  $E$  appears in both of those cases. We can therefore tighten this term to  $2S(E)$ . □

**Lemma 6.** *For all  $\epsilon > 0$  and any binary classification task with underlying distribution  $\mathcal{D}$  if there exists an  $(\epsilon\beta, \beta, \delta)$ -padded random partition  $\Pi$  of  $\text{supp}(\mathcal{D})$  then the following conditions hold. There exists a randomized algorithm  $ALG$  that given black-box access to classifier  $f$  produces a classifier  $g$  such that in expectation over the random choices of  $ALG$ :*

$$AR(g, \epsilon) \leq 2S(\epsilon\beta) + 2R(f) + \delta$$

and if  $AR(\epsilon) > 0$  then:

$$AR(g, \epsilon) \leq \frac{2S(\epsilon\beta)}{S(2\epsilon)} AR(\epsilon) + 2R(f) + \delta.$$

*Proof.* We will prove that Algorithm 1 invoked with  $f$  and  $\Pi \sim \mathcal{P}$  satisfies the statement of the Lemma. By Fact 1

$$AR(g, \epsilon) \leq R(g) + \mathbb{P}_{X \sim \mathcal{D}}[g \text{ not constant on } B_\epsilon(X)]. \quad (15)$$

By Lemma 5 we have:

$$R(g) \leq 2S(\epsilon\beta) + 2R(f). \quad (16)$$

Moreover, by Corollary 1 we have that:

$$\mathbb{E}_{\Pi \sim \mathcal{P}}[\mathbb{P}_{X \sim \mathcal{D}}[B_\epsilon(X) \not\subseteq \Pi(X)]] \leq \delta. \quad (17)$$

But we also know from the definition of  $g$  that

$$\begin{aligned} \mathbb{P}_{X \sim \mathcal{D}}[g \text{ is not constant on } B_\epsilon(X)] &\leq \\ \mathbb{P}_{X \sim \mathcal{D}}[B_\epsilon(X) \not\subseteq \Pi(X)]. \end{aligned} \quad (18)$$

Combining (15),(16),(17) and (18) we get that in expectation over the random choices of the algorithm

$$\begin{aligned} AR(g, \epsilon) &\leq 2S(\epsilon\beta) + 2R(f) + \delta \\ &= \frac{2S(\epsilon\beta)}{S(2\epsilon)} AR(\epsilon) + 2R(f) + \delta, \end{aligned}$$

where in the last equality we used Lemma 1. Note that the last inequality is only valid if  $AR(\epsilon) > 0$ . □

## E Oblivious adversary

Let's consider the model where the adversary has full knowledge of the base classifier  $f$  and the code of the algorithm  $ALG$  that produces  $g$  but doesn't have access to random bits used by  $ALG$ . Then the following is true:

**Theorem 5.** *For every separable binary classification task in  $\mathbb{R}^d$  and for every  $\epsilon \in \mathbb{R}_+$  there exists a randomized algorithm  $ALG$  that, given black-box access to  $f : \mathbb{R}^d \rightarrow \{-1, 1\}$ , provides query access to a function  $g : \mathbb{R}^d \rightarrow \{-1, 1\}$  such that:*

- $R(g) \leq 2S(\epsilon) + 2R(f)$ ,
- For every  $x, x' \in \mathbb{R}^d$  we have that:

$$\mathbb{P}_{ALG}[g(x) \neq g(x')] \leq O\left(\frac{\|x - x'\|_2 \cdot \sqrt{d}}{\epsilon}\right).$$

*Proof.* The proof of this theorem is an adaptation of a random partition technique from Charikar et al. (1998). This paper presents an algorithm that creates a random partition that is  $(\epsilon, O(\sqrt{d}))$ -Lipshitz (a notion similar to *padded* partitions), that is a random partition that is  $\epsilon$ -bounded and for every  $x, x' \in \mathbb{R}^d$ :

$$\mathbb{P}[\Pi(x) \neq \Pi(x')] \leq O\left(\frac{\|x - x'\|_2 \cdot \sqrt{d}}{\epsilon}\right).$$

Using this partition  $ALG$  creates  $g$  using the framework from Algorithm 1. One can verify that this  $g$  satisfies the statements of the theorem.  $\square$

**Remark 4.** We note that the Algorithm from Charikar et al. (1998) is very similar to the random partition from Definition 9 as it also performs a version of ball carving. Based on this similarity, it is tempting to conjecture that the ball carving partition from Definition 9 is  $(\epsilon, O(\sqrt{d}))$ -Lipshitz also. We leave this as an interesting open question. Moreover, we note that the Algorithm from Charikar et al. (1998) can be easily adapted to any  $\ell_p$  norm achieving  $(\epsilon, O(d^{1/2p}))$ -Lipshitz partition for  $1 \leq p \leq 2$  and  $(\epsilon, O(d^{1-1/p}))$ -Lipshitz partition for  $p > 2$ . This means that using this technique one can get adversarial robustness guarantees for any  $\ell_p$  norm for  $p \geq 1$ .

Now observe that Theorem 5 gives us an algorithm  $\mathcal{A}$  that is robust against any oblivious adversary. The algorithm works as follows: for a series of queries  $x'_1, x'_2, \dots \in \mathbb{R}^d$  ( $x'_i$ 's are inputs crafted by the adversary), for every  $i$ ,  $\mathcal{A}$  using  $ALG$  from Theorem 5, recomputes a new  $g_i$  to answer query  $x'_i$ . We know that  $R(g_i) \leq 2S(\epsilon) + 2R(f)$  and moreover for every  $x, x'$  we have  $\mathbb{P}_{ALG}[g_i(x) \neq g_i(x')] \leq O\left(\frac{\|x - x'\|_2 \cdot \sqrt{d}}{\epsilon}\right)$ . This means that no matter what the strategy of the adversary is (this strategy might depend on  $g_1(x'_1), \dots, g_{i-1}(x'_{i-1})$ ) the probability that the adversary will be able to construct two points such that  $\|x_i - x'_i\|_2 \leq t$  and  $g_i(x_i) \neq g_i(x'_i)$  is upper bounded by  $O\left(\frac{t \cdot \sqrt{d}}{\epsilon}\right)$ .

We summarize: For every  $i$ , if  $X_i \sim \mathcal{D}$  at the  $i$ -th step and the adversary creates  $X'_i$  such that  $\|X_i -$

$X'_i\|_2 \leq \epsilon$  then for every  $\alpha$ :

$$\begin{aligned} \mathbb{P}_{X_i, \mathcal{A}}(g_i(X'_i) \neq h(X_i)) &\leq \\ 2S\left(\frac{\sqrt{d} \cdot \epsilon}{\alpha}\right) + 2R(f) + O(\alpha). \end{aligned}$$

Observe the connection to Definition 2 which we restate here for convenience:

$$AR(f, \epsilon) := \mathbb{P}_X(\exists \eta \in B_\epsilon f(X + \eta) \neq h(X)).$$

The reason that we were able to gain a factor  $\sqrt{d}$  in comparison to Theorem 2 is that we didn't need to ensure that a function is constant on a ball  $B(x, \epsilon)$ . It was enough to show that it is constant for every fixed pair of nearby points as the adversary can only test one point at a time.

This gain comes at a cost as we need to recompute the partition after every query. If one recomputes the partition every  $k$  queries then by the union bound the guarantee changes to:

$$\begin{aligned} \mathbb{P}_{X_i, \mathcal{A}}(g_i(X'_i) \neq h(X_i)) &\leq \\ 2S\left(\frac{\sqrt{d} \cdot k \cdot \epsilon}{\alpha}\right) + 2R(f) + O(\alpha). \end{aligned}$$
